# Supplementary material
Source: ML conference proceedings conference paper supplement (https://openreview.net/forum?id=3H37XciUEv)
Supplement: supplementary_material [file attachment]

## A Appendix

### A.1 Proxy Model Task Performance

Table 5: Proxy models performance on the target tasks with and without fine-tuning.

| Experiment Tasks                    | GPT-2       |            | BERT        |            |
|-------------------------------------|-------------|------------|-------------|------------|
|                                     | Pre-trained | Fine-tuned | Pre-trained | Fine-tuned |
| Snarks                              | 38.8        | 47.2       | 30.5        | 38.8       |
| Causal Judgment                     | 44.7        | 55.2       | 44.7        | 52.6       |
| Ruin Names                          | 07.8        | 26.9       | 10.1        | 22.4       |
| Formal Fallacies                    | 50.5        | 54.4       | 51.6        | 53.5       |
| Salient Translation Error Detection | 14.0        | 27.1       | 11.5        | 22.6       |
| CommonsenseQA                       | 07.4        | 29.1       | 08.8        | 26.9       |
| Coin Flip                           | 45.2        | 59.4       | 51.1        | 59.7       |

### A.2 Qualitative Analysis

Figure 3 shows an example from CommonsenseQA where GPT-3.5 responses using AO and CoT prompting yield an incorrect answer. The most likely reason for this is that these prompt strategies don’t seem to capture all the key points of the input sentence, i.e., the context in the input is based on eyes rather than the overall body. However, this crucial detail is captured when GPT-3.5 is prompted with AMPLIFY. We observe that the GPT-3.5 response is correct, and it acknowledges "eyes" as the most important clue in making the correct prediction.

### A.3 Hyper-parameter Analysis

Recall that AMPLIFY has two other primary hyper-parameters apart from the rationale template choice discussed in our empirical findings, namely,  $s$ , which is the size of the few-shot prompt created for LLMs, and  $k$ , which is the number of most important tokens identified by the post hoc explanation. Table 6 shows the LLM performance variations for different combinations of  $(k, s)$ . It is important to note that AMPLIFY does not have scalability constraints with increasing  $s$  and  $k$ , as AMPLIFY computes prompts automatically. This is unlike CoT, where increasing the size of the few-shot prompt would require more human effort to generate relevant chains of thoughts.

### A.4 Impact of BERT as Proxy Model on LLM Performance

Table 7 shows LLM performance when BERT is used as the proxy model in step 1 of AMPLIFY. We observe similar trends as those observed for the case of GPT-2, where fine-tuning proxy model provides marginal improvements in general. This indicates that the fine-tuning step could be avoided in most cases to reduce additional computational overhead.

## B Limitations and Broader Impacts

Our work proposes a new framework, AMPLIFY, which focuses on improving the task performance of LLMs by injecting automatically generated rationales. This framework results in the reduction of reliance on processes that require heavy human intervention. These processes, which rely on rationales based on human annotations, often suffer from noise and biases, which may transfer to LLMs during in-context learning. We hope that automated rationale creation will provide a solution to mitigate this problem. While our approach provides significant improvements in model performance, the broader negative impact pertaining to LLMs, such as safety concerns in the form of misinformation[2], social bias[2], hallucination[12], etc., and the massive carbon footprint due to heavy usage of LLMs [17], may still persist even when using our proposed framework. Other than the limitations of LLMs, our framework relies on post hoc explanation methods to create automated rationales; hence, AMPLIFY may also inherit widely studied issues with post hoc explanations such as robustness[14], the disagreement problem[13], stability[26], etc.

**Table 6:** This figure shows LLM performance for the different selections of  $k$  and  $s$  hyper-parameters of AMPLIFY, as denoted by  $(k, s)$  for each column. In general, we observe  $(k = 7, s = 10)$  achieves the best results for most of the datasets.

| Experiment Tasks                    | GPT-3 ( $k,s$ ) |        |         |             | GPT-3.5 ( $k,s$ ) |        |             |             |
|-------------------------------------|-----------------|--------|---------|-------------|-------------------|--------|-------------|-------------|
|                                     | (2, 5)          | (5, 5) | (5, 10) | (7, 10)     | (2, 5)            | (5, 5) | (5, 10)     | (7, 10)     |
| Snarks                              | 63.8            | 72.2   | 80.5    | 80.5        | 75.0              | 80.5   | <b>91.6</b> | 88.8        |
| Causal Judgment                     | 52.6            | 57.8   | 60.5    | 60.5        | 65.7              | 73.6   | 76.3        | <b>76.3</b> |
| Ruin Names                          | 64.0            | 75.2   | 76.4    | <b>78.6</b> | 73.0              | 75.2   | 77.5        | 77.5        |
| Formal Fallacies                    | 55.5            | 57.9   | 59.8    | <b>59.8</b> | 56.3              | 58.8   | 59.6        | 59.6        |
| Salient Translation Error Detection | 49.7            | 50.2   | 51.2    | 51.2        | 52.7              | 56.2   | 60.8        | <b>60.8</b> |
| CommonsenseQA                       | 72.8            | 73.1   | 73.3    | 73.5        | 76.0              | 76.7   | 77.6        | <b>77.9</b> |
| Coin Flip (OOD)                     | 64.9            | 65.3   | 65.7    | <b>65.7</b> | 63.3              | 65.0   | 65.3        | 65.3        |
| All Tasks ( <i>avg</i> )            | 60.4            | 64.5   | 66.7    | 67.1        | 66.0              | 69.4   | <b>72.6</b> | 72.3        |

**Table 7:** Few-shot prompting performance of multiple LLMs on the seven datasets when post hoc explanations, which form the rationale in the prompt constructed during step 4 of AMPLIFY, are generated using models with varying degrees of fine-tuning of the proxy model (BERT in this case). Here, "E" represents the number of epochs the proxy model was fine-tuned. "E = 0" indicates that the proxy model was used to generate post hoc explanations without any fine-tuning. The recorded performance in this table represents the percentage of test samples for which the LLM accurately predicted the true label.

| Experiment Tasks                    | GPT-3 |        |             | GPT-3.5 |        |             |
|-------------------------------------|-------|--------|-------------|---------|--------|-------------|
|                                     | E = 0 | E = 10 | E = 200     | E = 0   | E = 10 | E = 200     |
| Snarks                              | 66.6  | 72.2   | 72.2        | 80.8    | 80.8   | <b>88.8</b> |
| Causal Judgment                     | 50.0  | 52.6   | 57.8        | 71.0    | 73.6   | <b>73.6</b> |
| Ruin Names                          | 70.7  | 73.0   | <b>73.0</b> | 71.9    | 71.9   | 71.9        |
| Formal Fallacies                    | 56.2  | 56.9   | <b>58.5</b> | 56.7    | 56.9   | 57.8        |
| Salient Translation Error Detection | 50.2  | 51.2   | 51.2        | 56.2    | 59.2   | <b>60.8</b> |
| CommonsenseQA                       | 71.3  | 71.8   | 72.4        | 76.1    | 76.5   | <b>77.4</b> |
| Coin Flip (OOD)                     | 65.4  | 65.8   | <b>65.9</b> | 63.7    | 64.3   | 65.1        |
| All Tasks ( <i>avg</i> )            | 61.2  | 63.1   | 68.0        | 68.0    | 69.0   | <b>70.7</b> |

**Test Sample**

**Q:** Unlike a spider and his many sight seers, people only have what? Answer Choices: (A) tongues (B) names (C) brains (D) feelings (E) two eyes.

**AO**

(C) brains ✗

**CoT**

The question is asking for something that people have that spiders and their sight seers don't have. Of the above choices, only brains are something that both spiders and their sight seers don't have. So the answer is (C). ✗

**AMPLIFY**

The key words : "eyes", "spider", "sight seers", "people", and "unlike" are important clues to predict (E) as the correct answer . The answer is (E) . ✓

**Figure 3:** This image exemplifies an instance of CommonsenseQA task where standard prompts and CoT produce inaccurate responses. The CoT response fails to take into account the context in the question being related to eyes. In contrast, the response generated by AMPLIFY emphasizes this crucial detail.
